# Supplementary material for: Caspase-1 activates gasdermin A in non-mammals
Source: PubMed Central journal article supplement (PMC10948149; doi:10.7554/elife.92362), 2024-03-18

Caspase-1 0   

P1 D A D A D A D A

  
GSDMA

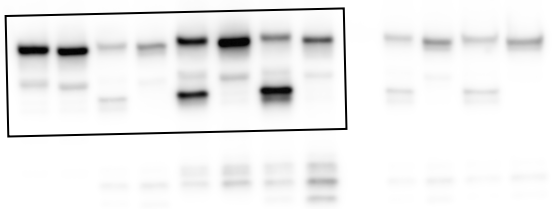

Supplement: elife-92362-fig3-data7.pdf [file elife-92362-fig3-data7.pdf]
