# Supplementary material for: Caspase-1 activates gasdermin A in non-mammals
Source: PubMed Central journal article supplement (PMC10948149; doi:10.7554/elife.92362), 2024-03-18
Supplement: elife-92362-fig3-data11.pdf [file elife-92362-fig3-data11.pdf]

Caspase-1

∅      🐔      👤 👤      🐷  
D A    D A    D A    D A

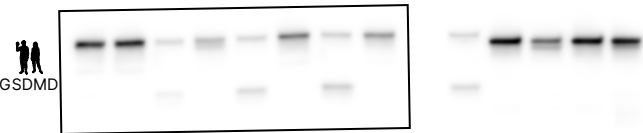

GSDMD
