# Supplementary material for: Caspase-1 activates gasdermin A in non-mammals
Source: PubMed Central journal article supplement (PMC10948149; doi:10.7554/elife.92362), 2024-03-18

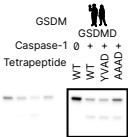

Supplement: elife-92362-fig5-data5.pdf [file elife-92362-fig5-data5.pdf]
