# Supplementary material for: Caspase-1 activates gasdermin A in non-mammals
Source: PubMed Central journal article supplement (PMC10948149; doi:10.7554/elife.92362), 2024-03-18

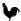

GSDMA

|              |    |    |      |      |
|--------------|----|----|------|------|
| Caspase-1    | ⊖  | +  | +    | +    |
| Tetrapeptide | WT | WT | YVAD | AAAD |

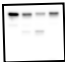

Supplement: elife-92362-fig5-data7.pdf [file elife-92362-fig5-data7.pdf]
