# Supplementary material for: Caspase-1 activates gasdermin A in non-mammals
Source: PubMed Central journal article supplement (PMC10948149; doi:10.7554/elife.92362), 2024-03-18

GSDMA

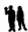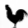

P4-P1  
SpeB

WT

WT  
(FASD)

AAAD

FASA

- +

- +

- +

- +

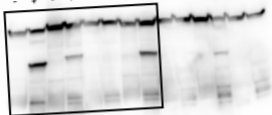

GSDMA

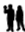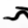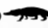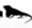

P4-P1

SpeB

WT

WT

WT

WT

- +

- +

- +

- +

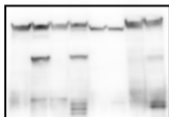

Supplement: elife-92362-fig6-data10.pdf [file elife-92362-fig6-data10.pdf]
