# Supplementary material for: Caspase-1 activates gasdermin A in non-mammals
Source: eLife journal article supplement (doi:10.7554/elife.92362), 2023-11-22
Supplement: fig1-figsupp3-data2 [file elife-92362-fig1-figsupp3-data2-v1.pdf]

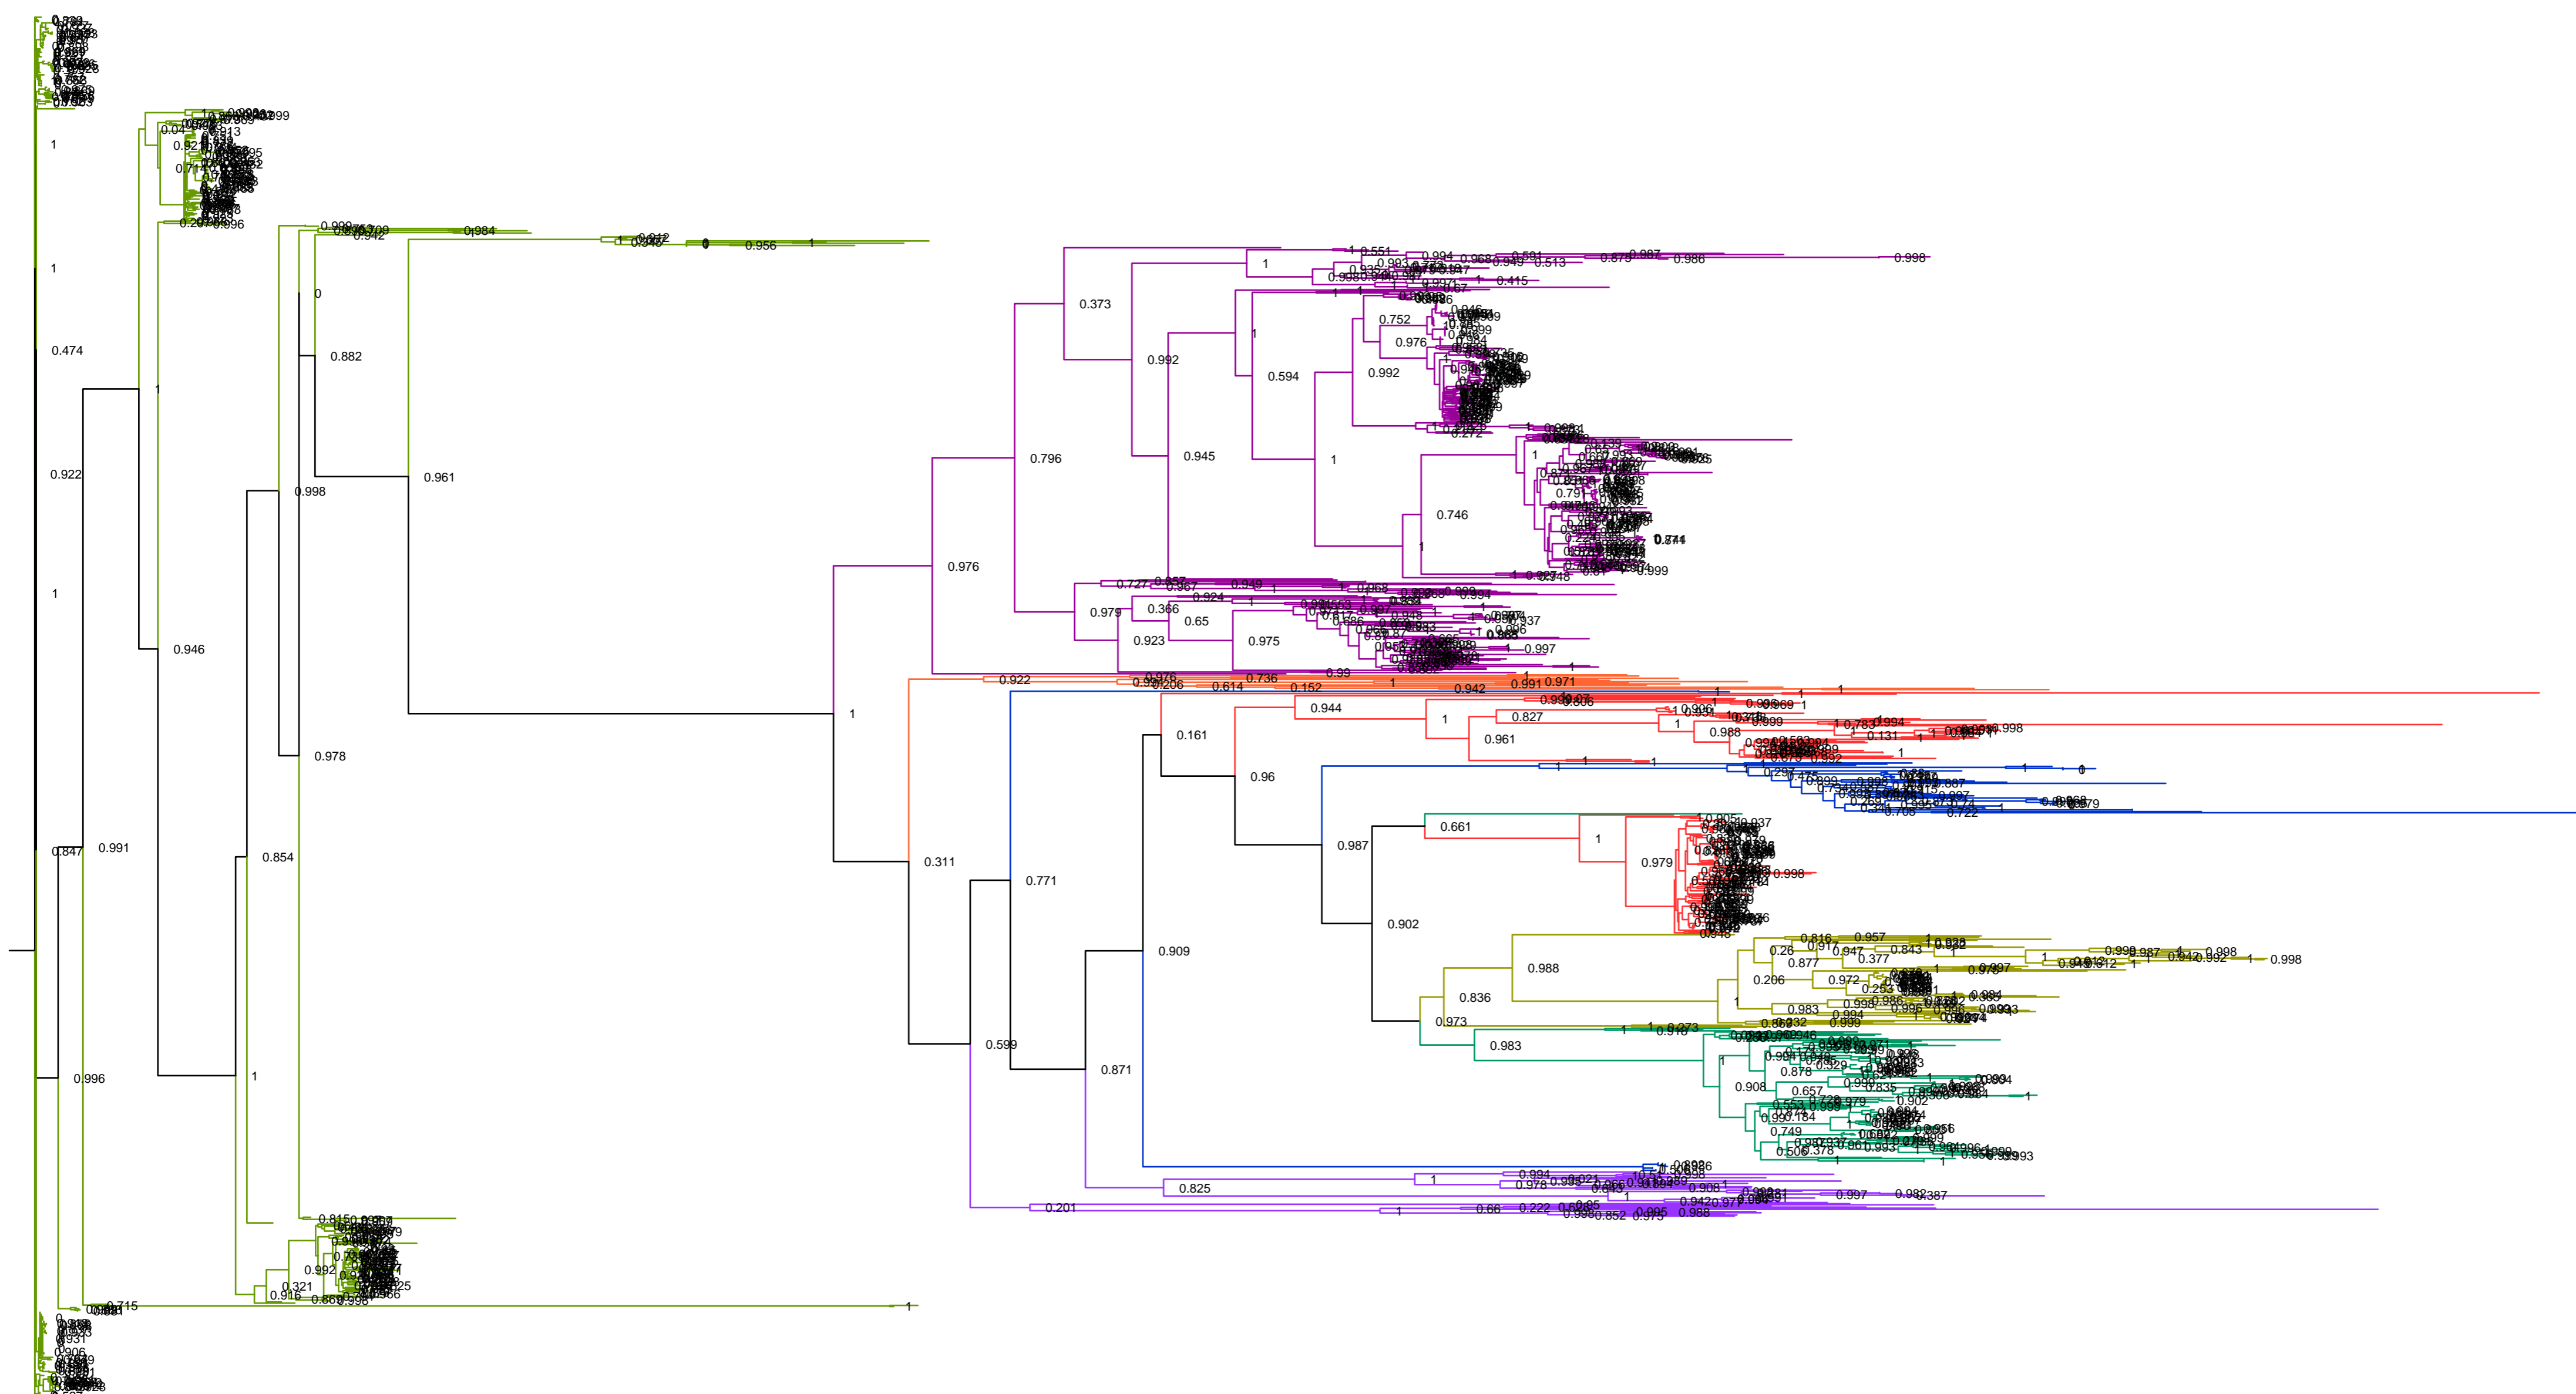

0.5
