# Supplementary material for: Caspase-1 activates gasdermin A in non-mammals
Source: eLife journal article supplement (doi:10.7554/elife.92362), 2023-11-22

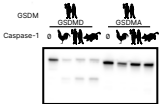

Supplement: fig3-data15 [file elife-92362-fig3-data15-v1.pdf]
