# Supplementary material for: Caspase-1 activates gasdermin A in non-mammals
Source: eLife journal article supplement (doi:10.7554/elife.92362), 2023-11-22

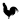

GSDMA

|           |   |   |   |
|-----------|---|---|---|
| Caspase-9 | - | + | + |
| AP20187   | - | - | + |
| P1        | D | D | D |

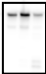

Supplement: fig3-data17 [file elife-92362-fig3-data17-v1.pdf]
