# Supplementary material for: Caspase-1 activates gasdermin A in non-mammals
Source: eLife journal article supplement (doi:10.7554/elife.92362), 2023-11-22

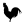

GSDME

Caspase-9  
AP20187  
P1

|   |   |   |   |   |   |
|---|---|---|---|---|---|
| - | - | + | + | + | + |
| - | - | - | + | - | + |
| D | A | D | D | A | A |

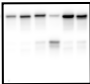

Supplement: fig3-data19 [file elife-92362-fig3-data19-v1.pdf]
