# Supplementary material for: Caspase-1 activates gasdermin A in non-mammals
Source: eLife journal article supplement (doi:10.7554/elife.92362), 2023-11-22

|            | Crow  | Crow  | Human | Human |
|------------|-------|-------|-------|-------|
|            | GSDMA | GSDME | GSDMA | GSDMD |
| Human CASP | 0 1 3 | 0 1 3 | 0 1 3 | 0 1 3 |

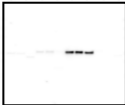

Supplement: fig3-figsupp2-data2 [file elife-92362-fig3-figsupp2-data2-v1.pdf]
