# Supplementary material for: Caspase-1 activates gasdermin A in non-mammals
Source: eLife. 2024 Mar 18;12:RP92362. doi: 10.7554/eLife.92362 (PMC10948149; doi:10.7554/eLife.92362)
Supplement: Figure 3—source data 1. [file elife-92362-fig3-data1.xlsx]

## Sheet: Sheet1
chicken_id	tissue	gsdma	gsdma	gsdma	gsdme	gsdme	gsdme	casp1	casp1	casp1	rrna18s	rrna18s	rrna18s
1	ileum	27.7956	27.9096	27.9008	23.4388	23.4945	23.4725	21.85	21.8342	21.8501	6.97289	7.01873	7.05359
1	jejunum	27.8201	27.681	27.6737	26.4293	26.46	26.4674	21.9816	21.9823	21.9683	6.99487	6.97092	7.00627
1	duodenum	28.0063	28.0623	28.094	27.2036	27.2007	27.1509	22.3136	22.3392	22.3443	7.11561	7.09286	7.11948
1	cecal_tonsil	27.3671	27.3222	27.3996	26.0441	26.087	26.1472	22.1572	22.1079	22.099	6.96335	6.97634	6.99077
1	spleen	25.4152	25.495	25.3795	26.0953	26.0583	26.0798	24.0247	23.9863	24.0382	7.15794	7.2864	7.20537
1	skin	27.7827	27.6148	27.8343	27.1457	27.0589	27.1633	25.6601	25.7811	25.6789	7.47567	7.61703	7.61593
1	liver	27.1016	27.1262	27.091	30.3382	30.4412	30.1279	25.2469	25.242	25.2432	7.03164	6.99321	6.98099
1	bursa	25.9495	25.7674	25.7994	26.9878	26.9678	26.9951	24.2081	24.1441	24.1544	6.91449	6.98158	6.99006
2	ileum	29.5311	29.2558	29.2317	25.4648	25.5539	25.4471	23.5389	23.4931	23.5179	7.62825	7.66519	7.64613
2	jejunum	29.1898	29.0594	29.3462	26.3245	26.4731	26.4007	23.185	23.154	23.1603	7.58885	7.61682	7.58678
2	duodenum	29.2206	29.3574	29.283	27.5978	27.5123	27.7783	23.9127	23.8843	23.8414	7.55076	7.5216	7.58007
2	cecal_tonsil	27.2504	27.2836	27.3716	27.6838	27.4461	27.5534	24.1714	24.2806	24.181	7.64768	7.68417	7.6583
2	spleen	27.1441	27.0518	26.9766	27.0813	26.9299	27.0001	25.5235	25.4929	25.5616	7.80071	7.85569	7.75326
2	skin	29.0892	28.9966	28.8761	26.7179	26.7248	26.638	25.8875	25.9155	26.0194	7.87802	7.84915	7.92424
2	liver	28.7926	28.9139	28.9587	30.9354	31.5901	31.1688	26.6663	26.6167	26.6742	7.53125	7.47199	7.52017
2	bursa	26.8496	26.826	26.7742	27.8168	27.7496	27.7826	24.876	24.8873	24.9235	7.4987	7.44261	7.50792
3	ileum	29.1277	29.0245	29.0247	26.7586	26.8273	26.6891	23.0378	22.9999	22.9823	7.54964	7.51771	7.55378
3	jejunum	28.862	28.7302	28.9278	26.5097	26.6584	26.7006	23.8338	23.8881	23.8369	7.36644	7.38495	7.46149
3	duodenum	30.637	30.6664	31.2196	29.722	29.4037	29.601	26.0967	26.0282	26.1534	7.31639	7.30417	7.32468
3	cecal_tonsil	27.7312	27.9187	27.9542	27.3931	27.4072	27.2397	23.3354	23.3693	23.3305	7.3749	7.27451	7.43916
3	spleen	26.854	26.7382	26.9577	26.917	26.9889	27.0123	25.2349	25.2197	25.248	7.52907	7.5196	7.5297
3	skin	28.9572	29.2455	28.9534	27.1289	27.118	27.0088	26.1676	26.1308	26.0974	7.23846	7.17725	7.20322
3	liver	29.207	29.0936	28.9702	31.2525	31.9348	31.7972	26.3826	26.4416	26.3531	7.44693	7.41174	7.3489
3	bursa	27.1709	27.085	27.1937	27.6954	27.9665	27.8777	24.8678	24.8793	24.9095	7.36158	7.3204	7.33516
4	ileum	29.3467	29.3746	28.9096	24.7536	24.7495	24.7996	23.5669	23.6108	23.5439	7.96986	8.09291	8.1411
4	jejunum	28.09	28.0182	28.0101	26.6515	26.7474	26.8641	24.0602	24.0502	24.0351	7.6587	7.63847	7.70737
4	duodenum	29.2727	28.8614	29.2011	27.8577	28.0854	28.0365	24.4787	24.4491	24.456	7.9837	7.97549	7.97265
4	cecal_tonsil	29.417	28.989	28.959	27.486	27.512	27.696	24.212	24.276	24.251	7.88	7.94	7.895
4	spleen	27.0274	27.1141	27.1587	27.2215	27.2106	27.1509	25.7733	25.7751	25.7372	7.82068	7.79281	7.78035
4	skin	29.6397	29.531	29.9732	28.0642	28.0063	27.9039	27.2497	27.1704	27.1968	7.71346	7.67092	7.72348
4	liver	28.8085	29.1568	29.112	31.5657	30.9641	31.6843	26.4586	26.4639	26.4021	7.76632	7.72949	7.77129
4	bursa	26.7098	26.6988	26.8202	27.734	27.7245	27.7185	24.7384	24.7474	24.685	7.49694	7.61451	7.65073
5	ileum	29.3118	29.0728	29.145	26.1756	26.3124	26.2565	23.2099	23.2492	23.1615	7.8518	7.91012	7.96031
5	jejunum	29.116	28.9785	28.9938	25.9759	26.0019	25.7562	23.2188	23.2121	23.2542	7.74125	7.74114	7.77516
5	duodenum	29.1473	28.917	28.847	27.7582	27.6452	27.6028	23.9656	24.0256	23.9693	7.92155	7.92366	7.93625
5	cecal_tonsil	27.126	27.2303	27.1866	27.0578	27.3915	27.0689	23.6415	23.7111	23.6354	7.81008	7.82789	7.86528
5	spleen	26.9709	27.0637	27.0786	26.8168	26.9667	26.9742	25.3089	25.4734	25.3289	7.80768	7.87158	7.95245
5	skin	28.999	28.9612	29.0123	27.4134	27.3988	27.3534	26.3185	26.4168	26.3407	7.97061	7.93883	7.98062
5	liver	28.6086	28.804	28.6048	31.2166	31.2385	30.7229	26.6025	26.4797	26.5525	7.9246	7.86033	7.86938
5	bursa	26.7325	26.4506	26.5587	27.5839	27.69	27.6821	24.8288	24.7888	24.8363	7.66588	7.82125	7.8402
6	ileum	28.9985	28.8238	29.0095	25.9932	25.9784	25.8706	24.3285	24.305	24.266	7.24	7.29951	7.32021
6	jejunum	28.3644	28.3944	28.442	27.6792	27.4576	27.6254	25.0861	25.0506	25.1065	7.48644	7.51993	7.39055
6	duodenum	28.9932	29.0632	29.2589	28.226	27.9873	28.1145	25.289	25.204	25.2647	7.53559	7.51364	7.50264
6	cecal_tonsil	28.553	28.8457	28.6977	27.102	26.987	27.0914	23.7507	23.8623	23.787	7.43672	7.45674	7.44414
6	spleen	27.108	27.1265	27.2132	26.9802	26.8551	26.9733	25.5664	25.542	25.4695	7.29042	7.38821	7.30248
6	skin	29.1864	28.8895	28.8965	26.9776	27.06	27.0429	27.1246	27.2975	27.1042	7.47223	7.43122	7.46455
6	liver	28.6844	28.4785	28.3583	31.2703	30.8128	32.2762	26.5843	26.4843	26.5237	6.99961	7.00968	6.9988
6	bursa	27.2255	26.9922	27.0745	27.7717	27.7234	27.8672	25.3449	25.4848	25.3867	7.18588	7.39853	7.33697
7	ileum	28.4755	28.1167	28.2178	26.582	26.8363	26.4158	23.2794	23.2758	23.2511	7.39419	7.44546	7.54401
7	jejunum	28.8824	29.2144	28.9628	28.0891	28.1246	28.2388	24.4267	24.4638	24.9716	7.6625	7.72623	7.72343
7	duodenum	28.4455	28.6246	28.7293	27.7713	27.7919	27.8141	23.9729	23.9963	23.9696	7.71563	7.76471	7.7269
7	cecal_tonsil	27.899	27.8284	27.8903	27.181	27.5096	27.3133	24.1021	24.1474	24.0563	7.65764	7.7189	7.64719
7	spleen	27.0907	27.1399	27.0252	27.3613	27.4167	27.3274	25.2134	25.2501	25.1969	7.7797	7.8105	7.7656
7	skin	28.4549	28.658	28.7443	27.3987	27.307	27.3827	26.2493	26.1842	26.2436	7.50212	7.51815	7.55453
7	liver	28.7002	28.7818	28.6282	32.3256	32.2731	32.409	26.3279	26.0866	26.2379	7.64804	7.67161	7.63837
7	bursa	26.9707	26.88	27.0352	28.1554	28.1985	28.1613	24.855	24.9138	24.8825	7.44544	7.55407	7.6468
8	ileum	28.5209	28.4145	27.9566	26.1546	26.2878	26.2324	23.3416	23.3401	23.2952	7.86989	7.97244	7.99689
8	jejunum	29.0096	29.4219	28.8079	28.1982	28.2163	28.1701	24.6831	24.7784	24.6159	8.08725	8.07543	8.12068
8	duodenum	28.5669	28.7165	28.9662	27.744	28.0465	28.0282	24.6467	24.6721	24.6314	7.90677	7.9433	7.98556
8	cecal_tonsil	27.8305	27.7951	27.6173	27.8555	27.8914	27.7065	24.5066	24.4992	24.4485	8.17085	8.22255	8.20778
8	spleen	26.9404	26.9155	26.6412	27.0268	27.2759	27.1328	25.5455	25.5406	25.515	8.01047	8.09674	8.06661
8	skin	28.6033	28.8859	28.6097	27.9008	28.0339	27.9099	26.8194	26.887	26.8723	7.85684	7.851	7.89834
8	liver	28.0009	27.8652	27.861	31.7482	31.3268	31.6495	26.4856	26.4313	26.4756	8.11737	8.06065	8.18524
8	bursa	26.6554	26.638	26.6734	28.0026	28.2301	28.1243	25.1397	25.1593	25.186	7.78223	7.81713	7.90687
